# Supplementary material for: Incidence of mesothelioma in Lombardy, Italy: exposure to asbestos, time patterns and future projections
Source: PubMed Central journal article supplement — Occup Environ Med. 2016 Jun 16;73(9):607–13. doi: 10.1136/oemed-2016-103652 (PMC5013098; doi:10.1136/oemed-2016-103652), 2016-06-16

**Supplementary Table 1** Industrial sectors in subjects with malignant mesothelioma, occupationally exposed to asbestos and never exposed to any source of asbestos, by gender, Lombardy Region Mesothelioma Registry, 2000-2012

|                                     | <b>Men</b>                            |          |                                                                                             |          | <b>Women</b>                          |          |                                                                                             |          |
|-------------------------------------|---------------------------------------|----------|---------------------------------------------------------------------------------------------|----------|---------------------------------------|----------|---------------------------------------------------------------------------------------------|----------|
|                                     | <b>Occupational asbestos exposure</b> |          | <b>No occupational, para-occupational, home-related, or environmental asbestos exposure</b> |          | <b>Occupational asbestos exposure</b> |          | <b>No occupational, para-occupational, home-related, or environmental asbestos exposure</b> |          |
|                                     | <b>N</b>                              | <b>%</b> | <b>N</b>                                                                                    | <b>%</b> | <b>N</b>                              | <b>%</b> | <b>N</b>                                                                                    | <b>%</b> |
| Industry* (same as in Table 1)      | 2099                                  | 100      | 493                                                                                         | 100      | 608                                   | 100      | 624                                                                                         | 100      |
| Metalmechanic and metallurgy        | 731                                   | 34.8     | 165                                                                                         | 33.5     | 51                                    | 8.4      | 80                                                                                          | 12.8     |
| Building construction               | 705                                   | 33.6     | 47                                                                                          | 9.5      | 0                                     | 0.0      | 2                                                                                           | 0.3      |
| Textile and clothing production     | 188                                   | 9.0      | 28                                                                                          | 5.7      | 398                                   | 65.5     | 142                                                                                         | 22.8     |
| Chemical                            | 122                                   | 5.8      | 39                                                                                          | 7.9      | 18                                    | 3.0      | 43                                                                                          | 6.9      |
| Motor vehicle production            | 136                                   | 6.5      | 33                                                                                          | 6.7      | 7                                     | 1.1      | 5                                                                                           | 0.8      |
| Food and beverage                   | 98                                    | 4.7      | 25                                                                                          | 5.1      | 21                                    | 3.5      | 20                                                                                          | 3.2      |
| Rubber                              | 71                                    | 3.4      | 3                                                                                           | 0.6      | 23                                    | 3.8      | 5                                                                                           | 0.8      |
| Military                            | 87                                    | 4.1      | 9                                                                                           | 1.8      | 0                                     | 0.0      | 0                                                                                           | 0.0      |
| Asbestos-cement                     | 65                                    | 3.1      | 0                                                                                           | 0.0      | 12                                    | 2.0      | 0                                                                                           | 0.0      |
| Health and social services          | 39                                    | 1.9      | 27                                                                                          | 5.5      | 38                                    | 6.3      | 60                                                                                          | 9.6      |
| Transport                           | 76                                    | 3.6      | 37                                                                                          | 7.5      | 0                                     | 0.0      | 4                                                                                           | 0.6      |
| Railroad production and maintenance | 51                                    | 2.4      | 0                                                                                           | 0.0      | 3                                     | 0.5      | 0                                                                                           | 0.0      |
| Energy production                   | 51                                    | 2.4      | 11                                                                                          | 2.2      | 0                                     | 0.0      | 2                                                                                           | 0.3      |
| Other industries*                   |                                       |          |                                                                                             |          |                                       |          |                                                                                             |          |
| Trade                               | 43                                    | 2.0      | 108                                                                                         | 21.9     | 1                                     | 0.2      | 104                                                                                         | 16.7     |
| Agriculture and livestock           | 19                                    | 0.9      | 64                                                                                          | 13.0     | 4                                     | 0.7      | 67                                                                                          | 10.7     |
| Education                           | 4                                     | 0.2      | 16                                                                                          | 3.3      | 5                                     | 0.8      | 62                                                                                          | 9.9      |
| Bank, insurance, and mail           | 16                                    | 0.8      | 49                                                                                          | 9.9      | 1                                     | 0.2      | 24                                                                                          | 3.9      |
| Oil extraction and refinery         | 37                                    | 1.8      | 2                                                                                           | 0.4      | 1                                     | 0.2      | 0                                                                                           | 0.0      |
| Mineral extraction                  | 10                                    | 0.5      | 0                                                                                           | 0.0      | 0                                     | 0.0      | 1                                                                                           | 0.2      |
| Synthetic textile                   | 35                                    | 1.7      | 4                                                                                           | 0.8      | 7                                     | 1.2      | 4                                                                                           | 0.6      |
| Refractory materials                | 28                                    | 1.3      | 11                                                                                          | 2.2      | 4                                     | 0.7      | 5                                                                                           | 0.8      |
| Shipbuilding                        | 22                                    | 1.0      | 0                                                                                           | 0.0      | 1                                     | 0.2      | 0                                                                                           | 0.0      |
| Wood and cork                       | 13                                    | 0.6      | 24                                                                                          | 4.9      | 1                                     | 0.2      | 6                                                                                           | 1.0      |
| Furniture and cabinet making        | 28                                    | 1.3      | 37                                                                                          | 7.5      | 3                                     | 0.5      | 14                                                                                          | 2.2      |
| Leather, skin, and shoes            | 4                                     | 0.2      | 15                                                                                          | 3.0      | 1                                     | 0.2      | 36                                                                                          | 5.8      |
| Glass and ceramic                   | 25                                    | 1.2      | 5                                                                                           | 1.0      | 11                                    | 1.8      | 0                                                                                           | 0.0      |
| Paper                               | 47                                    | 2.2      | 19                                                                                          | 3.9      | 1                                     | 0.2      | 35                                                                                          | 5.6      |
| Other manufacture                   | 16                                    | 0.8      | 7                                                                                           | 1.4      | 9                                     | 1.5      | 17                                                                                          | 2.7      |
| Jewellery                           | 12                                    | 0.6      | 0                                                                                           | 0.0      | 6                                     | 1.0      | 3                                                                                           | 0.5      |
| Recycling                           | 7                                     | 0.3      | 5                                                                                           | 1.0      | 2                                     | 0.3      | 1                                                                                           | 0.2      |
| Hotels and restaurants              | 4                                     | 0.2      | 17                                                                                          | 3.5      | 1                                     | 0.2      | 37                                                                                          | 5.9      |
| Public administration               | 22                                    | 1.0      | 14                                                                                          | 2.8      | 1                                     | 0.2      | 14                                                                                          | 2.2      |
| Other (miscellaneous)               | 58                                    | 2.8      | 56                                                                                          | 11.4     | 28                                    | 4.6      | 108                                                                                         | 17.3     |

\*A subject may have been exposed to asbestos in more than one industrial sector in his/her occupational history.

**Supplementary Table 2** Number of cases and incidence rates ( $\times 100,000$  person-years, italics) of malignant mesothelioma by gender, age at diagnosis (20-99 years)\*, and period of diagnosis, Lombardy Region Mesothelioma Registry, 2000-2012

| Age (years) | Men         |             |             |              | Women      |             |             |             |
|-------------|-------------|-------------|-------------|--------------|------------|-------------|-------------|-------------|
|             | 2000-2002   | 2003-2005   | 2006-2008   | 2009-2012    | 2000-2002  | 2003-2005   | 2006-2008   | 2009-2012   |
| 20-24       | 0           | 0           | 1           | 1            | 0          | 0           | 0           | 0           |
|             | -           | -           | <i>0.2</i>  | <i>0.2</i>   | -          | -           | -           | -           |
| 25-29       | 0           | 1           | 0           | 0            | 0          | 0           | 0           | 0           |
|             | -           | <i>0.1</i>  | -           | -            | -          | -           | -           | -           |
| 30-34       | 2           | 0           | 0           | 1            | 0          | 1           | 1           | 0           |
|             | <i>0.2</i>  | -           | -           | <i>0.1</i>   | -          | <i>0.1</i>  | <i>0.1</i>  | -           |
| 35-39       | 5           | 4           | 4           | 4            | 1          | 1           | 2           | 1           |
|             | <i>0.4</i>  | <i>0.3</i>  | <i>0.3</i>  | <i>0.2</i>   | <i>0.1</i> | <i>0.1</i>  | <i>0.2</i>  | <i>0.1</i>  |
| 40-44       | 7           | 9           | 5           | 8            | 6          | 3           | 4           | 3           |
|             | <i>0.7</i>  | <i>0.8</i>  | <i>0.4</i>  | <i>0.5</i>   | <i>0.6</i> | <i>0.3</i>  | <i>0.3</i>  | <i>0.2</i>  |
| 45-49       | 17          | 9           | 14          | 16           | 9          | 2           | 8           | 7           |
|             | <i>1.9</i>  | <i>0.9</i>  | <i>1.3</i>  | <i>1.0</i>   | <i>1.0</i> | <i>0.2</i>  | <i>0.8</i>  | <i>0.5</i>  |
| 50-54       | 30          | 19          | 23          | 34           | 12         | 6           | 11          | 8           |
|             | <i>3.2</i>  | <i>2.1</i>  | <i>2.5</i>  | <i>2.6</i>   | <i>1.2</i> | <i>0.6</i>  | <i>1.2</i>  | <i>0.6</i>  |
| 55-59       | 41          | 62          | 49          | 46           | 26         | 19          | 23          | 19          |
|             | <i>5.0</i>  | <i>7.0</i>  | <i>5.2</i>  | <i>3.9</i>   | <i>3.0</i> | <i>2.1</i>  | <i>2.4</i>  | <i>1.5</i>  |
| 60-64       | 89          | 99          | 71          | 105          | 38         | 37          | 22          | 42          |
|             | <i>10.5</i> | <i>11.9</i> | <i>8.9</i>  | <i>8.9</i>   | <i>4.2</i> | <i>4.1</i>  | <i>2.6</i>  | <i>3.3</i>  |
| 65-69       | 98          | 128         | 127         | 180          | 49         | 58          | 55          | 68          |
|             | <i>14.3</i> | <i>17.3</i> | <i>15.9</i> | <i>18.0</i>  | <i>6.0</i> | <i>6.8</i>  | <i>6.1</i>  | <i>6.1</i>  |
| 70-74       | 118         | 109         | 132         | 248          | 55         | 55          | 70          | 113         |
|             | <i>21.9</i> | <i>18.6</i> | <i>21.3</i> | <i>26.6</i>  | <i>7.4</i> | <i>7.2</i>  | <i>9.0</i>  | <i>10.1</i> |
| 75-79       | 81          | 100         | 112         | 193          | 59         | 50          | 89          | 117         |
|             | <i>21.8</i> | <i>24.5</i> | <i>24.5</i> | <i>28.7</i>  | <i>9.4</i> | <i>7.7</i>  | <i>13.0</i> | <i>12.5</i> |
| 80-84       | 37          | 44          | 66          | 123          | 32         | 45          | 72          | 107         |
|             | <i>23.4</i> | <i>19.2</i> | <i>24.2</i> | <i>29.1</i>  | <i>9.5</i> | <i>9.5</i>  | <i>13.5</i> | <i>14.3</i> |
| 85-89       | 15          | 22          | 33          | 63           | 23         | 30          | 22          | 56          |
|             | <i>14.5</i> | <i>26.8</i> | <i>32.1</i> | <i>31.77</i> | <i>8.1</i> | <i>13.0</i> | <i>8.2</i>  | <i>11.5</i> |
| 90-94       | 7           | 15          | 6           | 14           | 7          | 17          | 9           | 12          |
|             | <i>23.6</i> | <i>40.9</i> | <i>16.1</i> | <i>30.5</i>  | <i>6.2</i> | <i>12.3</i> | <i>6.5</i>  | <i>7.3</i>  |
| 95-99       | 2           | 0           | 1           | 0            | 1          | 3           | 3           | 3           |
|             | <i>48.1</i> | -           | <i>14.3</i> | -            | <i>4.6</i> | <i>10.2</i> | <i>7.8</i>  | <i>5.0</i>  |
| Total       | 549         | 621         | 644         | 1036         | 318        | 327         | 391         | 556         |
|             | <i>5.2</i>  | <i>5.7</i>  | <i>5.8</i>  | <i>6.9</i>   | <i>2.8</i> | <i>2.8</i>  | <i>3.3</i>  | <i>3.4</i>  |

\*No cases were recorded in subjects <20 years of age

**Supplementary Table 3** Number of cases and incidence rates ( $\times 100,000$  person-years, italics) of malignant mesothelioma in men, by age at diagnosis (20-99 years)\* and birth cohort, Lombardy Region Mesothelioma Registry, 2000-2012

| Age<br>(years) | Cohort |       |       |       |       |       |       |       |       |       |       |       |       |       |       |       |       |       |       |
|----------------|--------|-------|-------|-------|-------|-------|-------|-------|-------|-------|-------|-------|-------|-------|-------|-------|-------|-------|-------|
|                | 1900-  | 1905- | 1910- | 1915- | 1920- | 1925- | 1930- | 1935- | 1940- | 1945- | 1950- | 1955- | 1960- | 1965- | 1970- | 1975- | 1980- | 1985- | Total |
| 20-24          |        |       |       |       |       |       |       |       |       |       |       |       |       |       |       | 0     | 0     | 2     | 2     |
|                |        |       |       |       |       |       |       |       |       |       |       |       |       |       |       | -     | -     | 0.2   | 0.1   |
| 25-29          |        |       |       |       |       |       |       |       |       |       |       |       |       |       | 0     | 1     | 0     | 0     | 1     |
|                |        |       |       |       |       |       |       |       |       |       |       |       |       |       | -     | 0.1   | -     | -     | 0.02  |
| 30-34          |        |       |       |       |       |       |       |       |       |       |       |       |       | 1     | 1     | 1     | 0     |       | 3     |
|                |        |       |       |       |       |       |       |       |       |       |       |       |       | 0.1   | 0.05  | 0.1   | -     |       | 0.1   |
| 35-39          |        |       |       |       |       |       |       |       |       |       |       |       | 4     | 7     | 6     | 0     |       |       | 17    |
|                |        |       |       |       |       |       |       |       |       |       |       |       | 0.5   | 0.3   | 0.3   | -     |       |       | 0.3   |
| 40-44          |        |       |       |       |       |       |       |       |       |       |       | 7     | 14    | 6     | 2     |       |       |       | 29    |
|                |        |       |       |       |       |       |       |       |       |       |       | 1.1   | 0.8   | 0.3   | 0.4   |       |       |       | 0.6   |
| 45-49          |        |       |       |       |       |       |       |       |       |       | 14    | 21    | 19    | 2     |       |       |       |       | 56    |
|                |        |       |       |       |       |       |       |       |       |       | 2.3   | 1.3   | 1.1   | 0.4   |       |       |       |       | 1.2   |
| 50-54          |        |       |       |       |       |       |       |       |       | 19    | 43    | 31    | 13    |       |       |       |       |       | 106   |
|                |        |       |       |       |       |       |       |       |       | 3.0   | 2.8   | 2.0   | 3.1   |       |       |       |       |       | 2.6   |
| 55-59          |        |       |       |       |       |       |       |       | 33    | 95    | 61    | 9     |       |       |       |       |       |       | 198   |
|                |        |       |       |       |       |       |       |       | 6.0   | 6.4   | 4.3   | 2.5   |       |       |       |       |       |       | 5.2   |
| 60-64          |        |       |       |       |       |       |       | 66    | 152   | 124   | 22    |       |       |       |       |       |       |       | 364   |
|                |        |       |       |       |       |       |       | 12.2  | 10.9  | 9.1   | 6.2   |       |       |       |       |       |       |       | 10.0  |
| 65-69          |        |       |       |       |       |       | 60    | 207   | 226   | 40    |       |       |       |       |       |       |       |       | 533   |
|                |        |       |       |       |       |       | 13.6  | 16.8  | 18.0  | 13.5  |       |       |       |       |       |       |       |       | 16.5  |
| 70-74          |        |       |       |       |       | 78    | 184   | 275   | 70    |       |       |       |       |       |       |       |       |       | 607   |
|                |        |       |       |       |       | 23.3  | 18.9  | 26.0  | 22.6  |       |       |       |       |       |       |       |       |       | 22.7  |
| 75-79          |        |       |       |       | 41    | 176   | 195   | 74    |       |       |       |       |       |       |       |       |       |       | 486   |
|                |        |       |       |       | 18.0  | 25.9  | 25.1  | 32.9  |       |       |       |       |       |       |       |       |       |       | 25.5  |
| 80-84          |        |       |       | 20    | 74    | 134   | 42    |       |       |       |       |       |       |       |       |       |       |       | 270   |
|                |        |       |       | 25.9  | 19.4  | 28.4  | 27.4  |       |       |       |       |       |       |       |       |       |       |       | 24.9  |
| 85-89          |        |       | 7     | 34    | 64    | 28    |       |       |       |       |       |       |       |       |       |       |       |       | 133   |
|                |        |       | 11.9  | 24.2  | 30.3  | 36.5  |       |       |       |       |       |       |       |       |       |       |       |       | 27.3  |
| 90-94          |        | 2     | 20    | 11    | 9     |       |       |       |       |       |       |       |       |       |       |       |       |       | 42    |
|                |        | 15.5  | 33.3  | 20.6  | 38.9  |       |       |       |       |       |       |       |       |       |       |       |       |       | 28.1  |
| 95-99          | 0      | 3     | 0     | 0     |       |       |       |       |       |       |       |       |       |       |       |       |       |       | 3     |
|                | -      | 36.8  | -     | -     |       |       |       |       |       |       |       |       |       |       |       |       |       |       | 10.6  |
| Total          | 0      | 5     | 27    | 65    | 188   | 416   | 481   | 622   | 481   | 278   | 140   | 68    | 50    | 16    | 9     | 2     | 0     | 2     | 2850  |
|                | -      | 23.7  | 20.5  | 23.6  | 22.3  | 26.6  | 20.5  | 20.3  | 13.7  | 7.3   | 3.6   | 1.7   | 1.0   | 0.3   | 0.2   | 0.04  | -     | 0.2   | 6.0   |

\*No cases were recorded in subjects <20 years of age

**Supplementary Table 4** Number of cases and incidence rates ( $\times 100,000$  person-years, italics) of malignant mesothelioma in women, by age at diagnosis (20-99 years)\* and birth cohort, Lombardy Region Mesothelioma Registry, 2000-2012

| Age<br>(years) | Cohort      |            |            |             |             |             |             |             |             |            |            |            |            |             |            |       |       |       | Total       |
|----------------|-------------|------------|------------|-------------|-------------|-------------|-------------|-------------|-------------|------------|------------|------------|------------|-------------|------------|-------|-------|-------|-------------|
|                | 1900-       | 1905-      | 1910-      | 1915-       | 1920-       | 1925-       | 1930-       | 1935-       | 1940-       | 1945-      | 1950-      | 1955-      | 1960-      | 1965-       | 1970-      | 1975- | 1980- | 1985- |             |
| 20-24          |             |            |            |             |             |             |             |             |             |            |            |            |            |             |            | 0     | 0     | 0     | 0           |
|                |             |            |            |             |             |             |             |             |             |            |            |            |            |             |            | -     | -     | -     | -           |
| 25-29          |             |            |            |             |             |             |             |             |             |            |            |            |            |             | 0          | 0     | 0     | 0     | 0           |
|                |             |            |            |             |             |             |             |             |             |            |            |            |            |             | -          | -     | -     | -     | -           |
| 30-34          |             |            |            |             |             |             |             |             |             |            |            |            |            | 0           | 2          | 0     | 0     |       | 2           |
|                |             |            |            |             |             |             |             |             |             |            |            |            |            | -           | <i>0.1</i> | -     | -     |       | <i>0.1</i>  |
| 35-39          |             |            |            |             |             |             |             |             |             |            |            |            | 2          | 1           | 2          | 0     |       |       | 5           |
|                |             |            |            |             |             |             |             |             |             |            |            |            | <i>0.3</i> | <i>0.05</i> | <i>0.1</i> | -     |       |       | <i>0.1</i>  |
| 40-44          |             |            |            |             |             |             |             |             |             |            |            | 5          | 6          | 5           | 0          |       |       |       | 16          |
|                |             |            |            |             |             |             |             |             |             |            |            | <i>0.8</i> | <i>0.3</i> | <i>0.3</i>  | -          |       |       |       | <i>0.3</i>  |
| 45-49          |             |            |            |             |             |             |             |             |             | 5          | 10         | 8          | 3          |             |            |       |       |       | 26          |
|                |             |            |            |             |             |             |             |             |             | <i>0.8</i> | <i>0.6</i> | <i>0.5</i> | <i>0.6</i> |             |            |       |       |       | <i>0.6</i>  |
| 50-54          |             |            |            |             |             |             |             |             | 7           | 16         | 10         | 4          |            |             |            |       |       |       | 37          |
|                |             |            |            |             |             |             |             |             | <i>1.1</i>  | <i>1.0</i> | <i>0.6</i> | <i>0.9</i> |            |             |            |       |       |       | <i>0.9</i>  |
| 55-59          |             |            |            |             |             |             |             | 22          | 31          | 32         | 2          |            |            |             |            |       |       |       | 87          |
|                |             |            |            |             |             |             |             | <i>3.8</i>  | <i>2.0</i>  | <i>2.2</i> | <i>0.5</i> |            |            |             |            |       |       |       | <i>2.2</i>  |
| 60-64          |             |            |            |             |             |             | 25          | 63          | 39          | 12         |            |            |            |             |            |       |       |       | 139         |
|                |             |            |            |             |             |             | <i>4.2</i>  | <i>4.2</i>  | <i>2.7</i>  | <i>3.2</i> |            |            |            |             |            |       |       |       | <i>3.5</i>  |
| 65-69          |             |            |            |             |             |             | 35          | 92          | 91          | 12         |            |            |            |             |            |       |       |       | 230         |
|                |             |            |            |             |             |             | <i>6.6</i>  | <i>6.5</i>  | <i>6.5</i>  | <i>3.7</i> |            |            |            |             |            |       |       |       | <i>6.3</i>  |
| 70-74          |             |            |            |             |             | 29          | 104         | 121         | 39          |            |            |            |            |             |            |       |       |       | 293         |
|                |             |            |            |             |             | <i>6.1</i>  | <i>8.2</i>  | <i>9.4</i>  | <i>10.9</i> |            |            |            |            |             |            |       |       |       | <i>8.6</i>  |
| 75-79          |             |            |            |             | 46          | 102         | 127         | 40          |             |            |            |            |            |             |            |       |       |       | 315         |
|                |             |            |            |             | <i>11.3</i> | <i>9.4</i>  | <i>11.3</i> | <i>13.6</i> |             |            |            |            |            |             |            |       |       |       | <i>10.8</i> |
| 80-84          |             |            |            | 15          | 78          | 120         | 43          |             |             |            |            |            |            |             |            |       |       |       | 256         |
|                |             |            |            | <i>8.5</i>  | <i>9.9</i>  | <i>13.7</i> | <i>17.3</i> |             |             |            |            |            |            |             |            |       |       |       | <i>12.2</i> |
| 85-89          |             |            | 9          | 48          | 47          | 27          |             |             |             |            |            |            |            |             |            |       |       |       | 131         |
|                |             |            | <i>5.3</i> | <i>12.3</i> | <i>8.8</i>  | <i>15.7</i> |             |             |             |            |            |            |            |             |            |       |       |       | <i>10.3</i> |
| 90-94          |             | 2          | 19         | 16          | 8           |             |             |             |             |            |            |            |            |             |            |       |       |       | 45          |
|                |             | <i>3.7</i> | <i>8.4</i> | <i>8.1</i>  | <i>10.7</i> |             |             |             |             |            |            |            |            |             |            |       |       |       | <i>8.1</i>  |
| 95-99          | 1           | 3          | 3          | 3           |             |             |             |             |             |            |            |            |            |             |            |       |       |       | 10          |
|                | <i>11.2</i> | <i>6.5</i> | <i>4.4</i> | <i>11.7</i> |             |             |             |             |             |            |            |            |            |             |            |       |       |       | <i>6.7</i>  |
| Total          | 1           | 5          | 31         | 82          | 179         | 278         | 309         | 278         | 215         | 89         | 65         | 27         | 20         | 9           | 4          | 0     | 0     | 0     | 1592        |
|                | <i>11.2</i> | <i>5.0</i> | <i>6.7</i> | <i>10.4</i> | <i>9.9</i>  | <i>10.7</i> | <i>9.7</i>  | <i>7.8</i>  | <i>5.6</i>  | <i>2.2</i> | <i>1.6</i> | <i>0.7</i> | <i>0.4</i> | <i>0.2</i>  | <i>0.1</i> | -     | -     | -     | <i>3.1</i>  |

\*No cases were recorded in subjects <20 years of age

**Supplementary Figure 1** Incidence rates (per 100,000 person-years) of malignant mesothelioma (20-99 years of age)\* by birth cohort for different categories of age at diagnosis, Lombardy Region Mesothelioma Registry, 2000-2012. Rates based on cases with occupational exposure to asbestos

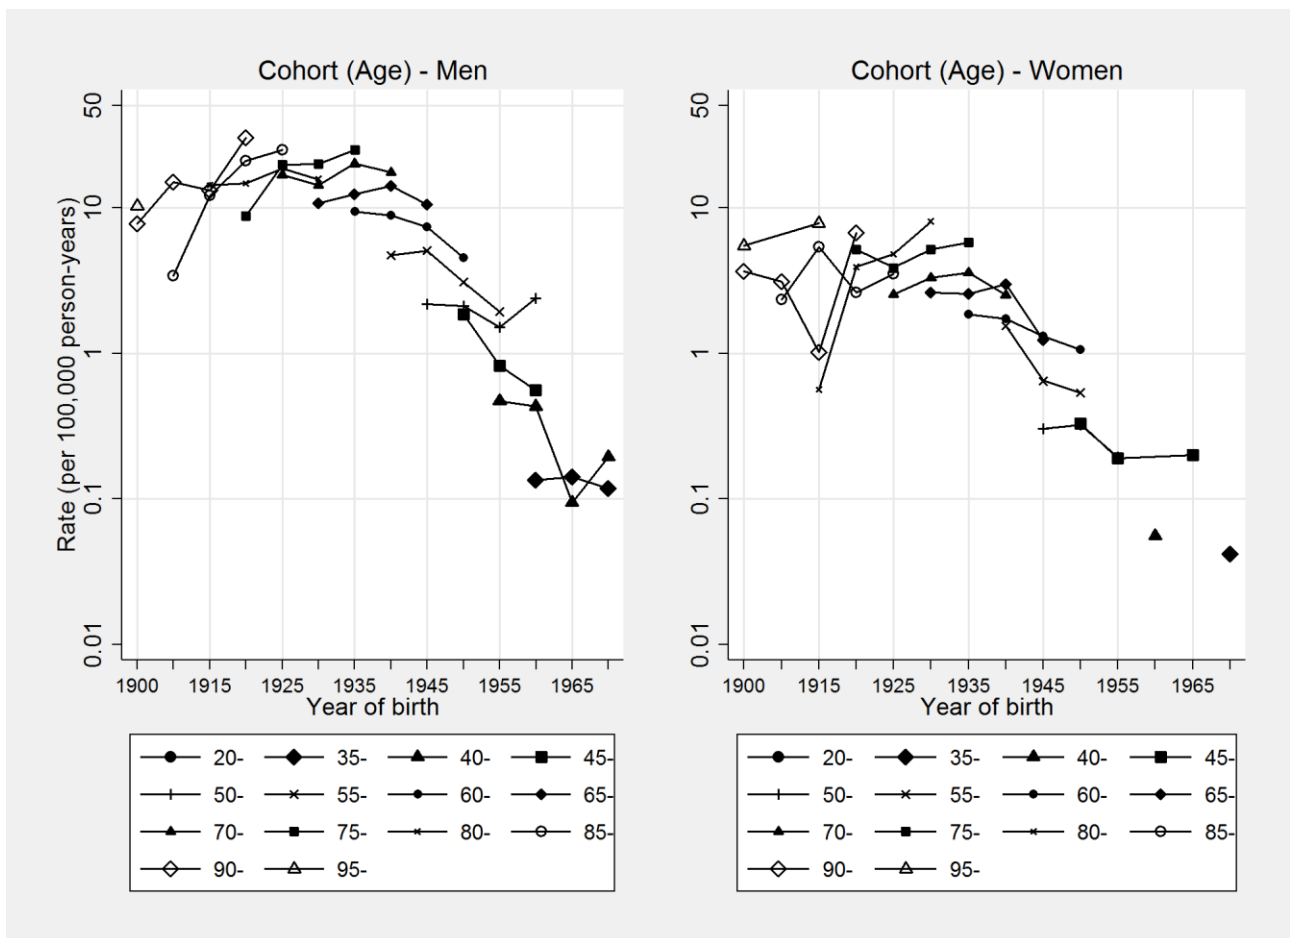

\*No cases were recorded in subjects <20 years of age. Because of small number of cases, ages 25-24, 25-29, and 30-34 and birth cohorts 1970-74, 1975-79, 1980-84, and 1985-89 were combined.

**Supplementary Figure 2** Incidence rates (per 100,000 person-years) of malignant mesothelioma (20-99 years of age)\* by birth cohort for different categories of age at diagnosis, Lombardy Region Mesothelioma Registry, 2000-2012. Rates based on cases without occupational exposure to asbestos

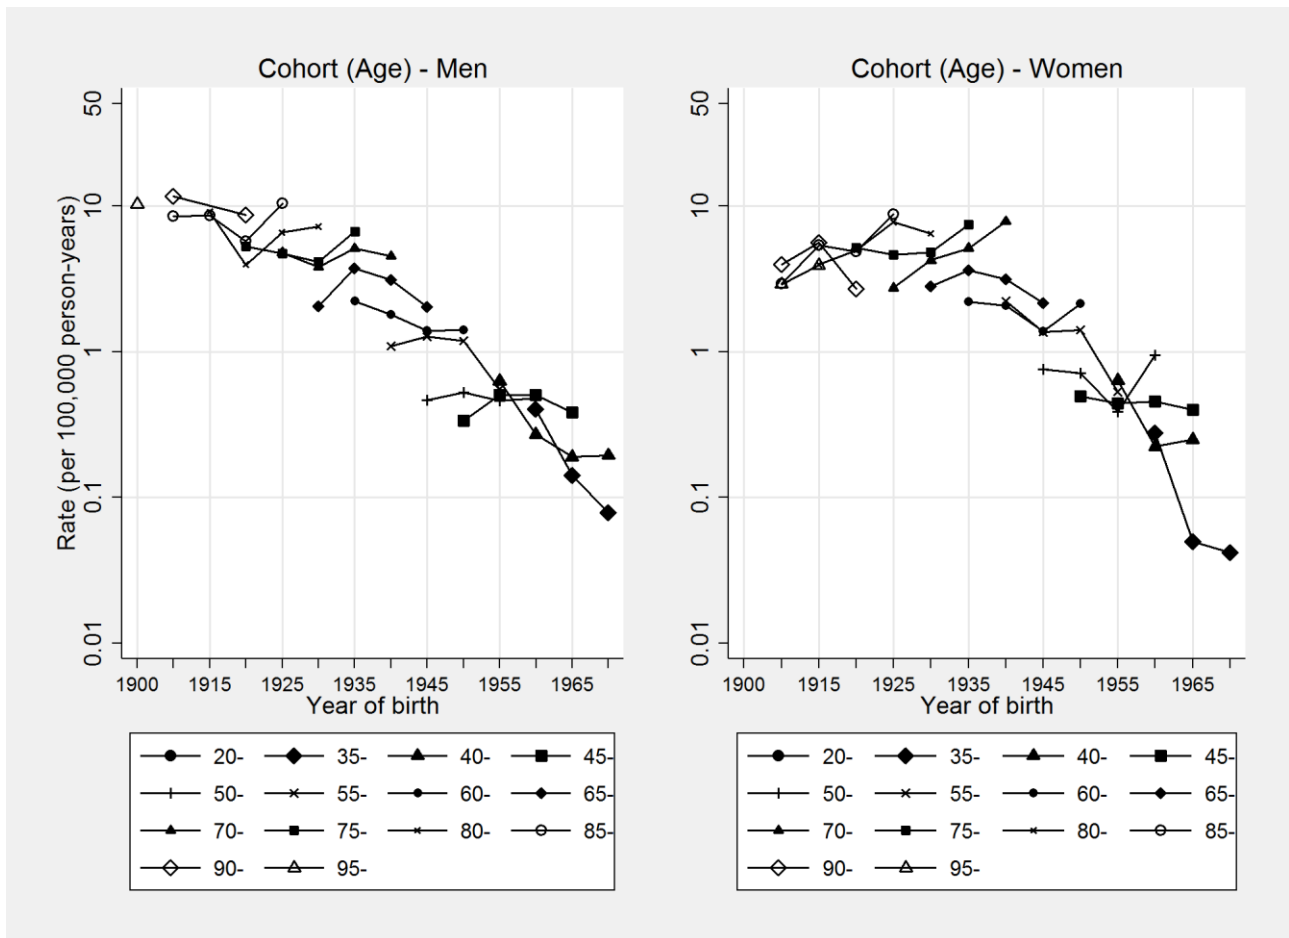

\*No cases were recorded in subjects <20 years of age. Because of small number of cases, ages 25-24, 25-29, and 30-34 and birth cohorts 1970-74, 1975-79, 1980-84, and 1985-89 were combined.

**Supplementary Figure 3** Incidence rates (per 100,000 person-years) of malignant mesothelioma by age at diagnosis (20-99 years)\* for different birth cohorts, Lombardy Region Mesothelioma Registry, 2000-2012. Rates based on cases with occupational exposure to asbestos

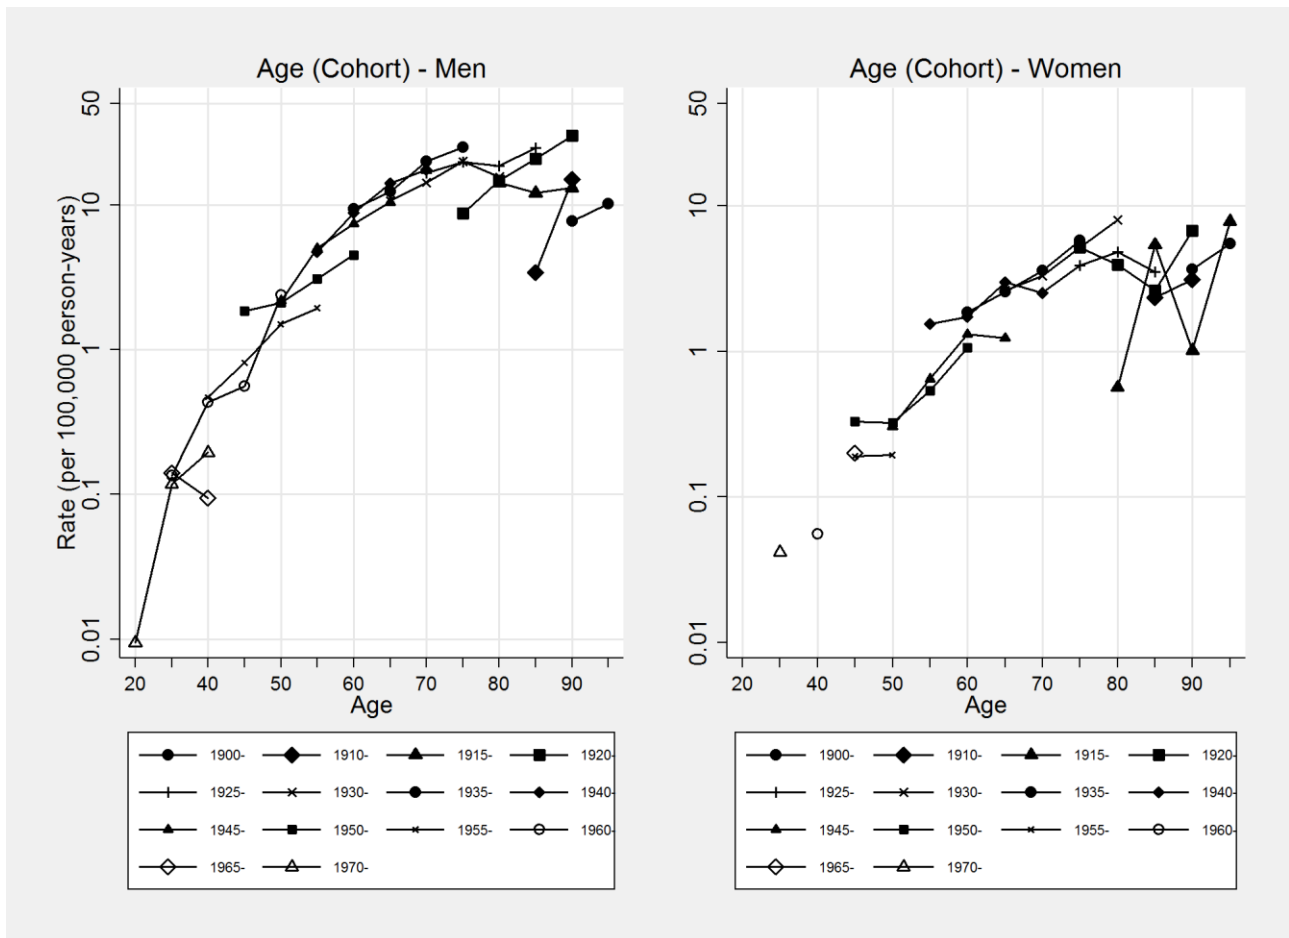

\*No cases were recorded in subjects <20 years of age. Because of small number of cases, ages 25-24, 25-29, and 30-34 and birth cohorts 1970-74, 1975-79, 1980-84, and 1985-89 were combined.

**Supplementary Figure 4** Incidence rates (per 100,000 person-years) of malignant mesothelioma by age at diagnosis (20-99 years)\* for different birth cohorts, Lombardy Region Mesothelioma Registry, 2000-2012. Rates based on cases without occupational exposure to asbestos

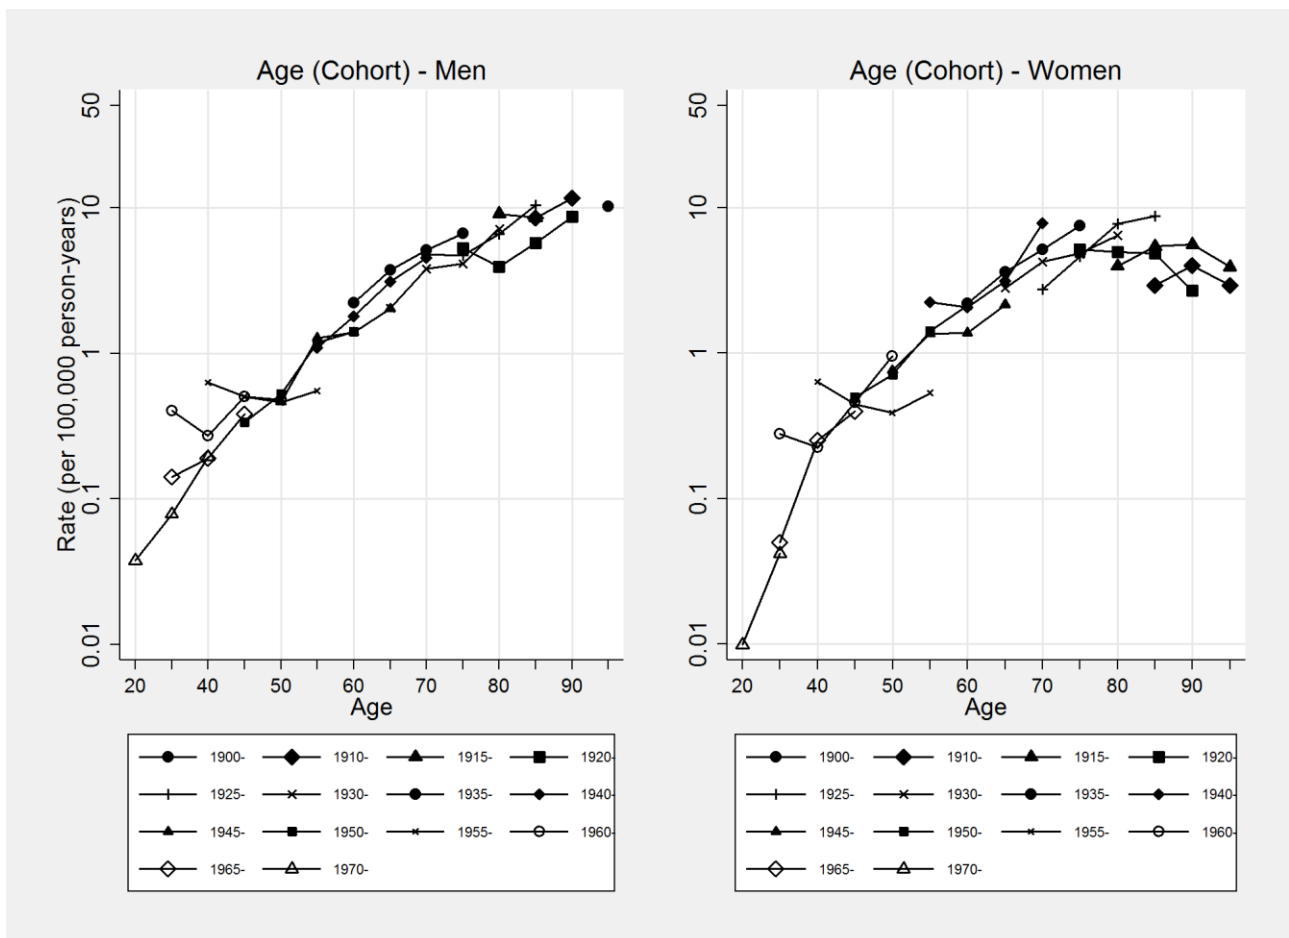

\*No cases were recorded in subjects <20 years of age. Because of small number of cases, ages 25-24, 25-29, and 30-34 and birth cohorts 1970-74, 1975-79, 1980-84, and 1985-89 were combined.



**Supplementary Figure 5** Observed (2000-2012), model predicted, and projected (2013-2029, based on Poisson age-cohort models) numbers of malignant mesothelioma cases (total and occupationally and non-occupationally exposed to asbestos) per year, by gender, Lombardy Region Mesothelioma Registry

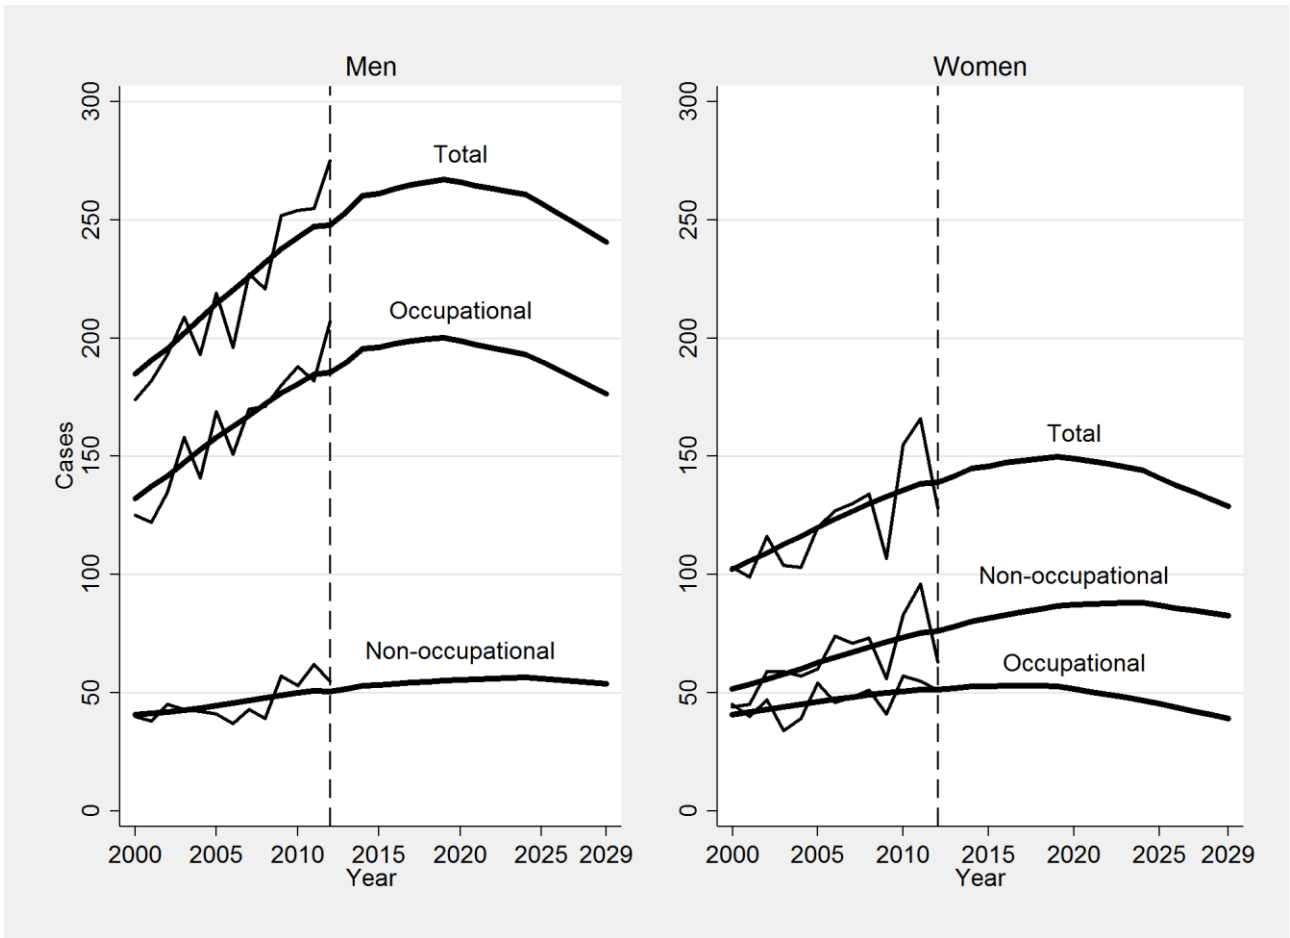

Supplement: oemed-2016-103652supp.pdf [file oemed-2016-103652supp.pdf]
